# Supplementary material
Source: PubMed Central journal article supplement (PMC11072516)

A

## GAS - all matrices

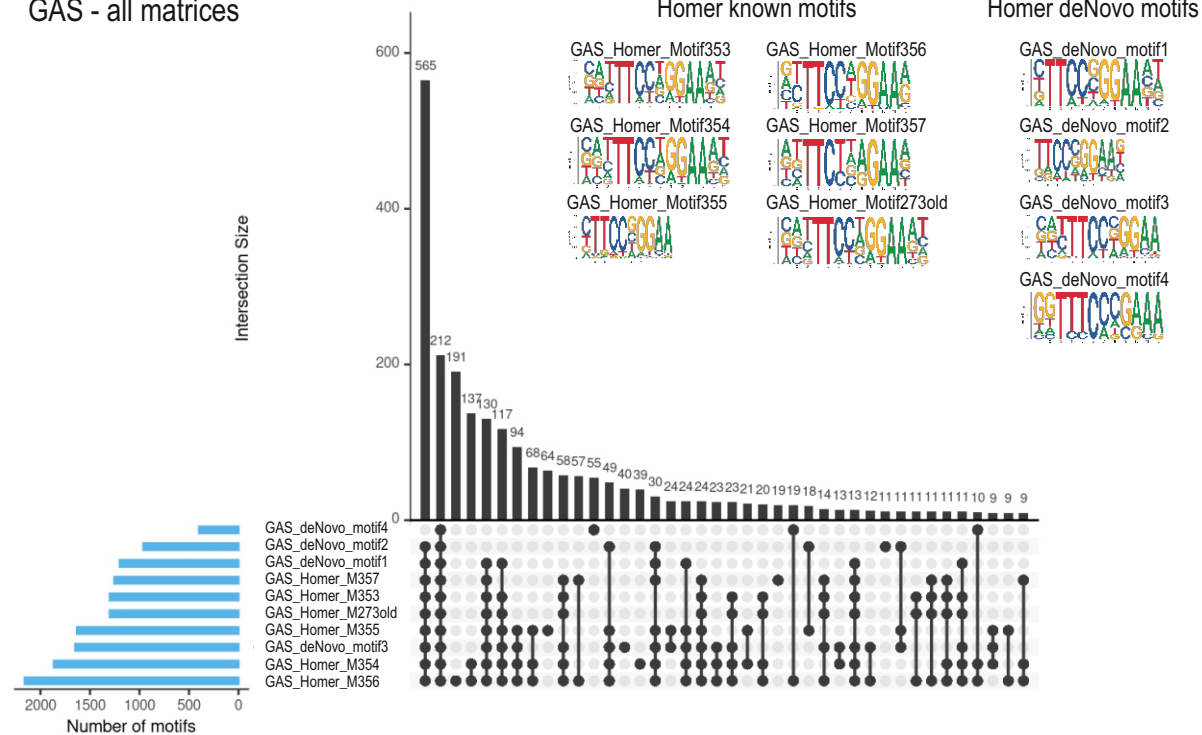

B

## GAS - selected matrices

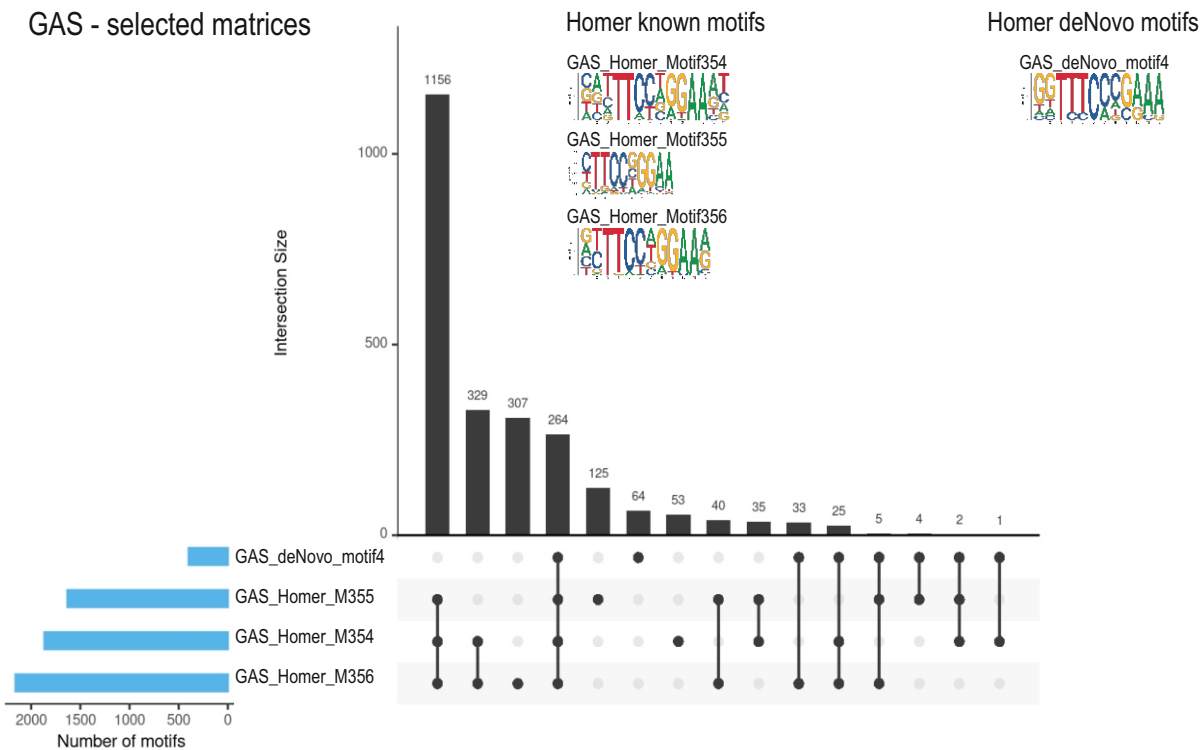

Supplement: 18_2023_4830_MOESM2_ESM.pdf [file 18_2023_4830_MOESM2_ESM.pdf]
