# Supplementary material
Source: PubMed Central journal article supplement (PMC11072516)

A

## ISRE - all matrices

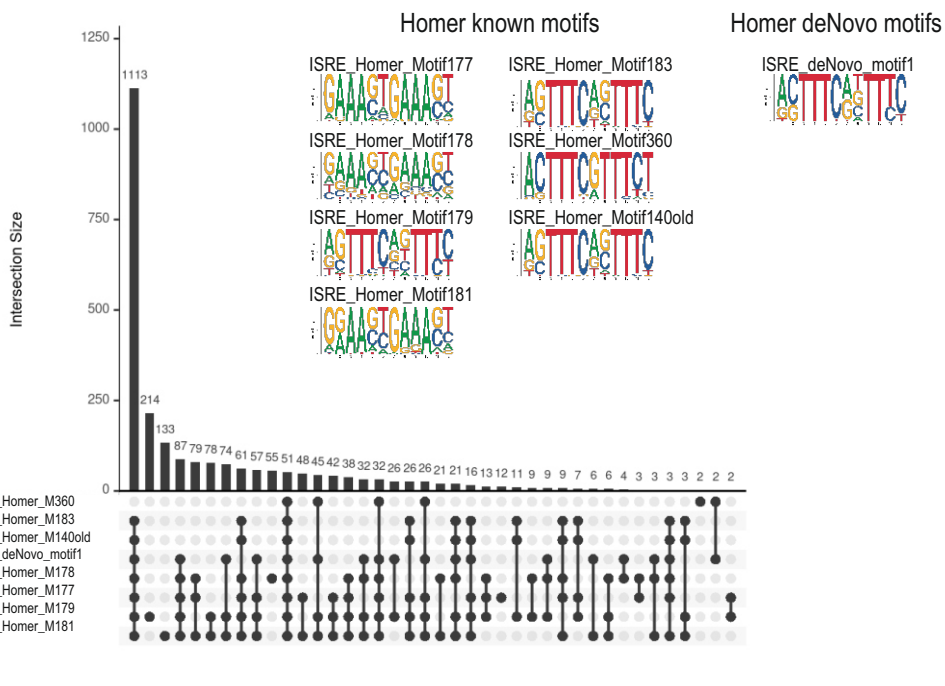

B

## ISRE - selected matrices

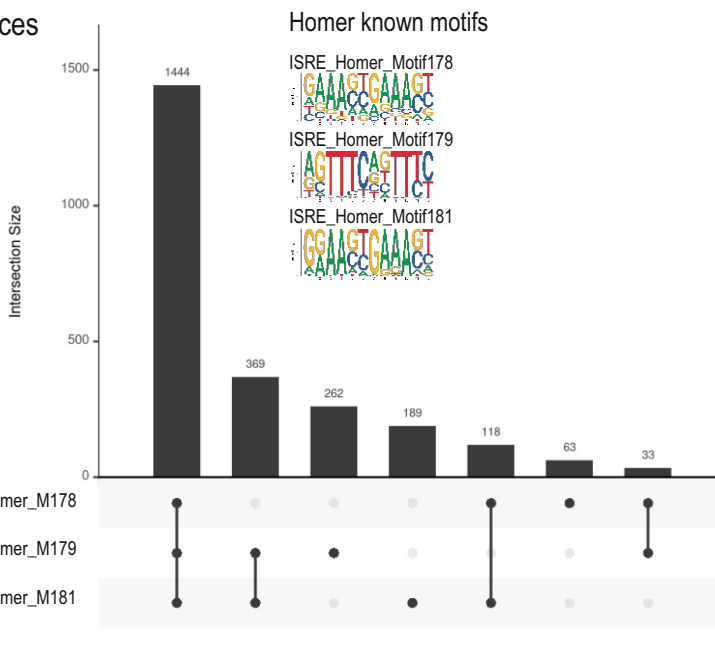

Supplement: 18_2023_4830_MOESM3_ESM.pdf [file 18_2023_4830_MOESM3_ESM.pdf]
