# Supplementary material
Source: PubMed Central journal article supplement (PMC11072516)

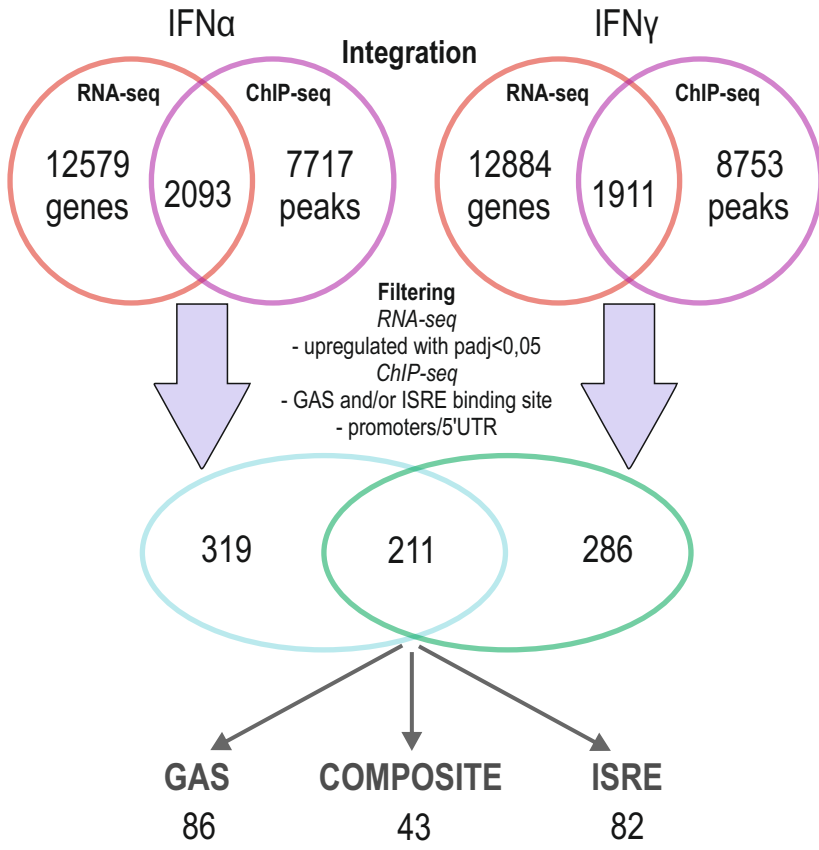

Supplement: 18_2023_4830_MOESM4_ESM.pdf [file 18_2023_4830_MOESM4_ESM.pdf]
